# Supplementary material for: Temporal Controls of the Asymmetric Cell Division Cycle in Caulobacter crescentus
Source: PLoS Comput Biol. 2009 Aug 14;5(8):e1000463. doi: 10.1371/journal.pcbi.1000463 (PMC2714070; doi:10.1371/journal.pcbi.1000463)
Supplement: Table S2 — Parameter Values (Wild Type) (0.22 MB DOC) [file pcbi.1000463.s006.doc]

**Table S2: Basal parameter values for the wild-type cell division cycle.**

| A. Rate constants, units = min-1 | | | | |
| --- | --- | --- | --- | --- |
| *k*s,CtrA-P1 = 0.0159, *k*s,CtrA-P2 = 0.14 | | | (Domian et al., 1999; Grunenfelder et al., 2001; Holtzendorff et al., 2004; Jacobs et al., 2003) | |
| *k*d,CtrA1 = 0.002 | | | (Hung and Shapiro, 2002) | |
| *k*d,CtrA2 = 0.25 | | | (Domian et al., 1997) | |
| *k*trans,CtrA~P = 0.025 | | | (Jacobs et al., 2003) | |
| *k*trans,CtrA = 0.095 | | | (Jacobs et al., 2003) | |
| *k*s,GcrA = 0.055 | | | (Holtzendorff et al., 2004) | |
| *k*d,GcrA = 0.022 | | | (Collier et al., 2006; Holtzendorff et al., 2004) | |
| *k*s,DnaA1 = 0.0031, *k*s,DnaA2 = 0.0022 | | | (Collier et al., 2007; Collier et al., 2006; Zweiger and Shapiro, 1994) | |
| *k*d,DnaA = 0.007 | | | (Gorbatyuk and Marczynski, 2005) | |
| *k*a,Ini = 0.01 | | | (Quon et al., 1998) | |
| *k*elong = 0.0065 | | | (Dingwall and Shapiro, 1989) | |
| *k*s,I = 0.09, *k*d,I = 0.04 | | | (Grunenfelder et al., 2001) | |
| *k*s,CcrM = 0.072 | | | (Grunenfelder et al., 2001) | |
| *k*d,CcrM = 0.07 | | | (Stephens et al., 1996) | |
| *k*m,Cori = 0.4, *k*m,ctrA = 0.4 | | | (Stephens et al., 1996) | |
| *k*m,ccrM = 0.4, *k*m,ftsZ = 0.4 | | | (Stephens et al., 1996) | |
| *k*s,PodJL = 0.043 | | | (Chen et al., 2006; Viollier et al., 2002b) | |
| *k*d,PodJL1 = 0.05, *k*d,PodJL2 = 0.002 | | | (Chen et al., 2006; Viollier et al., 2002b) | |
| *k*sep,PodJL = 0.3 | | | (Chen et al., 2006; Viollier et al., 2002b) | |
| *k*s,PerP = 0.04, *k*d,PerP = 0.02 | | | (Chen et al., 2006) | |
| *k*sep,PerP = 0.011 | | | (Chen et al., 2006) | |
| *k*s,DivJ1 = 0.002 | | | (Wheeler and Shapiro, 1999) | |
| *k*s,DivJ2 = 0.025 | | | (Jacobs et al., 2001) | |
| *k*d,DivJ = 0.002 | | | (Wheeler and Shapiro, 1999) | |
| *k*sep,divJ = 0.3 | | | (Jacobs et al., 2001; Pierce et al., 2006) | |
| *k*s,DivK = 0.0024 | | | (Grunenfelder et al., 2001) | |
| *k*d,DivK = 0.002, *k*d,DivK~P = 0.002 | | | (Jacobs et al., 2001) | |
| *k*trans,DivK = 0.15, *k*trans,DivK~P = 0.6 | | | (Jacobs et al., 2001) | |
| *k*trans,CckA~P = 0.05, *k*trans,CckA = 0.2 | | | (Iniesta et al., 2006; Jacobs et al., 2003) | |
| *k*trans,CpdR = 0.6, *k*trans,CpdR~P = 0.5 | | | (Iniesta et al., 2006) | |
| *k*trans,ParAATP = 0.5, *k*trans,ParAADP = 0.8 | | | (Figge et al., 2003) | |
| *k*s,RcdA = 0.023, *k*d,RcdA = 0.017 | | | (McGrath et al., 2006) | |
| *k*s,FtsQ = 0.1, *k*d,FtsQ = 0.035 | | | (Martin et al., 2004; Sackett et al., 1998) | |
| *k*s,FtsZ = 0.036 | | | (Martin et al., 2004; Sackett et al., 1998) | |
| *k*d,FtsZ1 = 0.009, *k*d,FtsZ2 = 0.02 | | | (Martin et al., 2004; Sackett et al., 1998) | |
| *k*d,FtsZ3 = 0.3 | | | (Aaron et al., 2007) | |
| *k*s,Zring = 0.035 | | | (Aaron et al., 2007) | |
| *k*Z,open = 0.8 | | | (Judd et al., 2003) | |
| *k*Z,closed1 = 0.0001, *k*Z,closed2 = 1.6 | | | (Judd et al., 2003) | |
| B. Binding constants and thresholds (dimensionless) | | | | |
| *J*i,CtrA-CtrA~P = 0.4 | *J*a,CtrA-CtrA~P = 0.45 | *J*d,CtrA-DivK~P = 0.55 | | *J*d,CtrA-CpdR = 0.6 |
| *J*d,CtrA-RcdA = 0.5 | *J*i,GcrA-CtrA = 0.4 | *J*i,DnaA-GcrA = 0.6 | | *J*a,DnaA-CtrA~P = 0.3 |
| *J*a,I-CtrA~P = 0.5 | *J*m,Cori = 0.95 | *J*m,ctrA = 0.95 | | *J*m,ccrM = 0.95 |
| *J*m,ftsZ = 0.95 | *J*i,PodJL-CtrA~P = 0.6 | *J*d,PodJL-PerP = 0.45 | | *J*sep, PodJL = 0.3 |
| *J*sep, PerP = 0.3 | *J*i,DivJ-PodJL = 0.13 | *J*sep, DivJ = 0.3 | | *J*a, DivK = 0.06 |
| *J*DivK~P-PodJL = 0.3 | *J*DivK-DivJ = 0.3 | *J*i, CckA-DivK~P = 0.3 | | *J*a, CpdR-CckA~P = 0.8 |
| *J*a, RcdA-CtrA~P = 0.4 | *J*a, FtsQ-CtrA~P = 0.5 | *J*FtsQ, DNA = 0.4 | | *J*i, FtsZ-CtrA~P = 0.7 |
| Ja,open = 0.01 | *J*Z-FtsQ = 0.8 | *J*a,closed = 0.05 | |  |
| *θ*CtrA~P = 0.5 | *θ*GcrA = 0.65 | *θ*DnaA = 0.65 | | *θ*Cori = 0.05 |
| *θ*Zring = 0.3 | *θ*ParAADP = 0.3 |  | |  |
| C. Gene positions on the chromosome (dimensionless, from [http://ecocyc.org](http://ecocyc.org/)) | | | | |
| *P*elonga= 0.05 | *P*ccrM= 0.2 | *P*ctrA = 0.375 | | *P*ftsZ = 0.625 |
| *aP*elong is assumed to be the end point of replication initiation and the starting point of chromosome elongation. | | | | |
